# Supplementary material for: Health-Associated Nutrition and Exercise Behaviors in Relation to Metabolic Risk Factors Stratified by Body Mass Index
Source: MDPI journal article supplement (doi:10.3390/ijerph16050869), 2019-03-09
Supplement: s1 [file s1]

## Supplementary Materials: Health-Associated Nutrition and Exercise Behaviors in Relation to Metabolic Risk Factors Stratified by Body Mass Index

**Table S1.** Crude correlations of metabolic risk factors and exercise and nutrition health behavior <sup>†</sup>.

| Variables *                                                               | WC<br>(cm) |        | FBG<br>(mg/dL) |       | SBP<br>(mmHg) |        | DBP<br>(mmHg) |        | HDL-C<br>(mg/dL) |        | TG<br>(mg/dL) |       |
|---------------------------------------------------------------------------|------------|--------|----------------|-------|---------------|--------|---------------|--------|------------------|--------|---------------|-------|
|                                                                           | r          | p      | r              | p     | r             | p      | r             | p      | r                | p      | r             | p     |
| <b>Physical Activity</b>                                                  |            |        |                |       |               |        |               |        |                  |        |               |       |
| Following a planned exercise program.                                     | −0.065     | <0.001 | −0.025         | 0.110 | 0.085         | <0.001 | 0.112         | <0.001 | 0.112            | <0.001 | −0.032        | 0.046 |
| Exercising vigorously for 20 or more minutes at least 3 times per week.   | −0.037     | 0.018  | −0.022         | 0.160 | 0.100         | <0.001 | 0.112         | <0.001 | 0.106            | <0.001 | −0.035        | 0.027 |
| Taking part in light to moderate physical activity.                       | 0.002      | 0.901  | −0.005         | 0.728 | 0.075         | <0.001 | 0.075         | <0.001 | 0.039            | 0.012  | −0.031        | 0.050 |
| Taking part in leisure-time (recreational) physical activities.           | −0.031     | 0.047  | −0.042         | 0.008 | 0.038         | 0.017  | 0.020         | 0.212  | 0.040            | 0.011  | −0.045        | 0.005 |
| Doing stretching exercises at least 3 times per week.                     | −0.080     | <0.001 | −0.015         | 0.354 | 0.012         | 0.455  | 0.033         | 0.036  | 0.059            | <0.001 | −0.021        | 0.188 |
| Getting exercise during usual daily activities.                           | −0.082     | <0.001 | −0.013         | 0.403 | 0.046         | 0.004  | 0.077         | <0.001 | 0.109            | <0.001 | −0.035        | 0.025 |
| Checking pulse rate when exercising.                                      | 0.026      | 0.108  | 0.033          | 0.039 | 0.087         | <0.001 | 0.064         | <0.001 | 0.009            | 0.587  | 0.002         | 0.876 |
| Reaching target heart rate when exercising.                               | −0.015     | 0.372  | 0.009          | 0.576 | 0.037         | 0.022  | 0.043         | 0.008  | 0.015            | 0.354  | −0.034        | 0.040 |
| <b>Nutrition</b>                                                          |            |        |                |       |               |        |               |        |                  |        |               |       |
| Choose a diet low in fat, saturated fat, and cholesterol.                 | −0.066     | <0.001 | 0.001          | 0.964 | 0.020         | 0.195  | 0.097         | <0.001 | 0.082            | <0.001 | −0.012        | 0.433 |
| Limiting the use of sugars and sweets.                                    | −0.050     | 0.002  | 0.020          | 0.203 | 0.024         | 0.134  | 0.053         | 0.001  | 0.074            | <0.001 | −0.008        | 0.633 |
| Eating daily servings of bread, cereal, rice and pasta                    | −0.029     | 0.073  | −0.003         | 0.866 | 0.012         | 0.444  | 0.020         | 0.209  | 0.022            | 0.183  | −0.017        | 0.293 |
| Eating daily servings of fruit.                                           | −0.006     | 0.689  | 0.008          | 0.603 | 0.031         | 0.053  | 0.092         | <0.001 | 0.059            | <0.001 | −0.012        | 0.469 |
| Eating daily servings of vegetables.                                      | −0.056     | <0.001 | −0.013         | 0.402 | 0.016         | 0.327  | 0.040         | 0.011  | 0.047            | 0.003  | −0.035*       | 0.028 |
| Eating daily servings of milk, yogurt or cheese.                          | −0.056     | 0.001  | −0.018         | 0.254 | −0.012        | 0.449  | −0.013        | 0.413  | 0.057            | <0.001 | −0.028        | 0.080 |
| Eating daily servings of meat, poultry, fish, dried beans, eggs and nuts. | −0.006     | 0.719  | −0.001         | 0.938 | −0.024        | 0.130  | −0.026        | 0.111  | −0.008           | 0.614  | −0.005        | 0.763 |
| Reading labels to identify nutrients.                                     | −0.067     | <0.001 | 0.005          | 0.744 | 0.002         | 0.886  | 0.055         | 0.001  | 0.091            | <0.001 | −0.052        | 0.001 |
| Eating breakfast.                                                         | −0.050     | 0.001  | −0.026         | 0.098 | 0.002         | 0.884  | 0.045         | 0.005  | 0.083            | <0.001 | −0.048        | 0.002 |

\* Abbreviations: WC, Waist circumference; FBG, Fasting blood glucose; SBP, Systolic blood pressure; DBP, Diastolic blood pressure; TG, Triglyceride; HDL-C, High-density lipoprotein cholesterol; BMI, body mass index. <sup>†</sup> Correlations of metabolic risk factors and nutrition and exercise health behavior were examined by bivariate correlation test.

**Table S2.** Correlations of metabolic risk factors and exercise and nutrition health behavior for BMI < 18.5 <sup>†</sup>.

| Variables *                                                               | WC<br>(cm) |       | FBG<br>(mg/dL) |       | SBP<br>(mmHg) |       | DBP<br>(mmHg) |       | HDL-C<br>(mg/dL) |       | TG<br>(mg/dL) |       |
|---------------------------------------------------------------------------|------------|-------|----------------|-------|---------------|-------|---------------|-------|------------------|-------|---------------|-------|
|                                                                           | r          | p     | r              | p     | r             | p     | r             | p     | r                | p     | r             | p     |
| <b>Physical Activity</b>                                                  |            |       |                |       |               |       |               |       |                  |       |               |       |
| Following a planned exercise program.                                     | −0.154     | 0.109 | −0.009         | 0.923 | 0.030         | 0.756 | 0.019         | 0.841 | 0.209            | 0.028 | −0.113        | 0.238 |
| Exercising vigorously for 20 or more minutes at least 3 times per week.   | −0.139     | 0.147 | 0.026          | 0.786 | 0.112         | 0.240 | 0.104         | 0.279 | 0.197            | 0.038 | −0.071        | 0.462 |
| Taking part in light to moderate physical activity.                       | −0.117     | 0.222 | 0.071          | 0.460 | 0.080         | 0.403 | −0.001        | 0.991 | −0.061           | 0.523 | −0.031        | 0.750 |
| Taking part in leisure-time (recreational) physical activities.           | −0.082     | 0.391 | 0.023          | 0.813 | −0.010        | 0.919 | −0.020        | 0.835 | 0.017            | 0.855 | −0.049        | 0.609 |
| Doing stretching exercises at least 3 times per week.                     | −0.143     | 0.133 | −0.163         | 0.085 | −0.070        | 0.464 | −0.072        | 0.448 | 0.154            | 0.104 | 0.002         | 0.987 |
| Getting exercise during usual daily activities.                           | −0.125     | 0.192 | 0.021          | 0.826 | 0.126         | 0.187 | 0.177         | 0.062 | 0.193*           | 0.043 | −0.020        | 0.839 |
| Checking pulse rate when exercising.                                      | 0.076      | 0.433 | 0.191          | 0.045 | 0.032         | 0.742 | 0.002         | 0.983 | −0.180           | 0.060 | 0.080         | 0.409 |
| Reaching target heart rate when exercising.                               | 0.055      | 0.583 | 0.155          | 0.117 | 0.029         | 0.769 | 0.004         | 0.971 | −0.273           | 0.005 | 0.265         | 0.007 |
| <b>Nutrition</b>                                                          |            |       |                |       |               |       |               |       |                  |       |               |       |
| Choose a diet low in fat, saturated fat, and cholesterol.                 | −0.231     | 0.015 | 0.156          | 0.102 | 0.054         | 0.576 | 0.081         | 0.397 | 0.201            | 0.035 | 0.071         | 0.456 |
| Limiting the use of sugars and sweets.                                    | −0.216     | 0.022 | 0.060          | 0.530 | −0.010        | 0.917 | 0.023         | 0.809 | 0.074            | 0.441 | 0.230         | 0.014 |
| Eating daily servings of bread, cereal, rice and pasta                    | −0.075     | 0.433 | 0.055          | 0.568 | 0.091         | 0.347 | 0.055         | 0.569 | 0.014            | 0.886 | 0.092         | 0.342 |
| Eating daily servings of fruit.                                           | −0.116     | 0.230 | 0.259          | 0.006 | −0.030        | 0.755 | 0.015         | 0.874 | 0.061            | 0.526 | 0.133         | 0.168 |
| Eating daily servings of vegetables.                                      | −0.096     | 0.312 | 0.066          | 0.488 | −0.014        | 0.885 | 0.015         | 0.874 | 0.067            | 0.482 | 0.074         | 0.437 |
| Eating daily servings of milk, yogurt or cheese.                          | −0.056     | 0.562 | 0.062          | 0.521 | 0.104         | 0.279 | 0.100         | 0.295 | −0.033           | 0.734 | −0.152        | 0.112 |
| Eating daily servings of meat, poultry, fish, dried beans, eggs and nuts. | 0.006      | 0.949 | 0.006          | 0.948 | 0.072         | 0.837 | 0.020         | 0.837 | 0.100            | 0.307 | 0.171         | 0.080 |
| Reading labels to identify nutrients.                                     | −0.100     | 0.293 | 0.112          | 0.239 | 0.125         | 0.190 | 0.144         | 0.129 | −0.023           | 0.807 | 0.124         | 0.192 |
| Eating breakfast.                                                         | −0.096     | 0.315 | 0.000          | 0.994 | 0.043         | 0.650 | 0.081         | 0.396 | 0.192            | 0.043 | 0.097         | 0.311 |

\* Abbreviations: WC, Waist circumference; FBG, Fasting blood glucose; SBP, Systolic blood pressure; DBP, Diastolic blood pressure; TG, Triglyceride; HDL-C, High-density lipoprotein cholesterol; BMI, body mass index. <sup>†</sup> Correlations of metabolic risk factors and nutrition and exercise health behavior were examined by bivariate correlation test.

**Table S3.** Correlations of metabolic risk factors and exercise and nutrition health behavior for  $18.5 \leq \text{BMI} < 24$  <sup>†</sup>.

| Variables *                                                               | WC<br>(cm) |        | FBG<br>(mg/dL) |       | SBP<br>(mmHg) |        | DBP<br>(mmHg) |        | HDL-C<br>(mg/dL) |        | TG<br>(mg/dL) |       |
|---------------------------------------------------------------------------|------------|--------|----------------|-------|---------------|--------|---------------|--------|------------------|--------|---------------|-------|
|                                                                           | r          | p      | r              | p     | r             | p      | r             | p      | r                | p      | r             | p     |
| <b>Physical Activity</b>                                                  |            |        |                |       |               |        |               |        |                  |        |               |       |
| Following a planned exercise program.                                     | −0.011     | 0.648  | −0.017         | 0.461 | 0.114         | <0.001 | 0.143         | <0.001 | 0.089            | <0.001 | −0.034        | 0.149 |
| Exercising vigorously for 20 or more minutes at least 3 times per week.   | −0.010     | 0.657  | −0.015         | 0.510 | 0.123         | <0.001 | 0.134         | <0.001 | 0.090            | <0.001 | −0.050        | 0.030 |
| Taking part in light to moderate physical activity.                       | 0.014      | 0.548  | −0.004         | 0.868 | 0.060         | 0.009  | 0.054         | 0.020  | 0.028            | 0.236  | −0.036        | 0.126 |
| Taking part in leisure-time (recreational) physical activities.           | −0.003     | 0.913  | −0.029         | 0.221 | 0.047*        | 0.042  | 0.024         | 0.312  | 0.036            | 0.123  | −0.061        | 0.009 |
| Doing stretching exercises at least 3 times per week.                     | −0.076     | 0.001  | −0.001         | 0.962 | 0.016         | 0.488  | 0.042         | 0.071  | 0.045            | 0.051  | −0.031        | 0.179 |
| Getting exercise during usual daily activities.                           | −0.062     | 0.008  | 0.002          | 0.918 | 0.049         | 0.035  | 0.081         | 0.001  | 0.104            | <0.001 | −0.015        | 0.508 |
| Checking pulse rate when exercising.                                      | 0.027      | 0.251  | 0.030          | 0.199 | 0.073         | 0.002  | 0.059         | 0.012  | 0.016            | 0.508  | −0.007        | 0.760 |
| Reaching target heart rate when exercising.                               | 0.024      | 0.329  | 0.046          | 0.056 | 0.071         | 0.003  | 0.070         | 0.004  | −0.010           | 0.682  | −0.059        | 0.015 |
| <b>Nutrition</b>                                                          |            |        |                |       |               |        |               |        |                  |        |               |       |
| Choose a diet low in fat, saturated fat, and cholesterol.                 | −0.027     | 0.247  | −0.001         | 0.965 | 0.024         | 0.298  | 0.099         | <0.001 | 0.070            | 0.003  | 0.009         | 0.714 |
| Limiting the use of sugars and sweets.                                    | −0.070     | 0.003  | 0.025          | 0.288 | 0.014         | 0.550  | 0.056         | 0.016  | 0.093            | <0.001 | 0.018         | 0.439 |
| Eating daily servings of bread, cereal, rice and pasta                    | −0.012     | 0.617  | 0.005          | 0.828 | 0.013         | .590   | 0.035         | 0.137  | −0.012           | 0.604  | 0.008         | 0.733 |
| Eating daily servings of fruit.                                           | 0.007      | 0.774  | −0.012         | 0.614 | 0.000         | 0.991  | 0.067         | 0.004  | 0.066            | 0.005  | 0.000         | 0.976 |
| Eating daily servings of vegetables.                                      | −0.046     | 0.048  | −0.024         | 0.298 | 0.005         | 0.838  | 0.052         | 0.024  | 0.048            | 0.040  | −0.029        | 0.212 |
| Eating daily servings of milk, yogurt or cheese.                          | −0.104     | <0.001 | −0.006         | 0.785 | −0.046        | 0.053  | −0.055        | 0.019  | 0.081            | 0.001  | −0.052        | 0.027 |
| Eating daily servings of meat, poultry, fish, dried beans, eggs and nuts. | −0.023     | .336   | 0.025          | 0.299 | −0.045        | 0.057  | −0.031        | 0.188  | −0.019           | 0.417  | −0.002        | 0.946 |
| Reading labels to identify nutrients.                                     | −0.102     | <0.001 | −0.019         | 0.408 | −0.008        | 0.740  | 0.038         | 0.099  | 0.099            | <0.001 | −0.034        | 0.144 |
| Eating breakfast.                                                         | −0.029     | 0.217  | 0.007          | 0.760 | 0.018         | 0.450  | 0.057         | 0.015  | 0.073            | 0.002  | −0.021        | 0.364 |

\* Abbreviations: WC, Waist circumference; FBG, Fasting blood glucose; SBP, Systolic blood pressure; DBP, Diastolic blood pressure; TG, Triglyceride; HDL-C, High-density lipoprotein cholesterol; BMI, body mass index. <sup>†</sup> Correlations of metabolic risk factors and nutrition and exercise health behavior were examined by bivariate correlation test.

**Table S4.** Correlations of metabolic risk factors and exercise and nutrition health behavior for  $24 \leq \text{BMI} < 27$  <sup>†</sup>.

| Variables *                                                               | WC<br>(cm) |       | FBG<br>(mg/dL) |       | SBP<br>(mmHg) |        | DBP<br>(mmHg) |        | HDL-C<br>(mg/dL) |        | TG (mg/dL) |       |
|---------------------------------------------------------------------------|------------|-------|----------------|-------|---------------|--------|---------------|--------|------------------|--------|------------|-------|
|                                                                           | r          | p     | r              | p     | r             | p      | r             | p      | r                | p      | r          | p     |
| <b>Physical Activity</b>                                                  |            |       |                |       |               |        |               |        |                  |        |            |       |
| Following a planned exercise program.                                     | −0.051     | 0.071 | −0.018         | 0.515 | 0.074         | 0.009  | 0.112         | <0.001 | 0.129            | <0.001 | 0.003      | 0.910 |
| Exercising vigorously for 20 or more minutes at least 3 times per week.   | −0.070     | 0.012 | −0.016         | 0.578 | 0.082         | 0.003  | 0.100         | <0.001 | 0.142            | <0.001 | −0.015     | 0.588 |
| Taking part in light to moderate physical activity.                       | 0.037      | 0.191 | 0.000          | 0.982 | 0.104         | <0.001 | 0.106         | <0.001 | 0.076            | 0.007  | −0.006     | 0.829 |
| Taking part in leisure-time (recreational) physical activities.           | −0.049     | 0.076 | −0.031         | 0.264 | 0.046         | 0.096  | 0.028         | 0.324  | 0.064            | 0.022  | −0.044     | 0.116 |
| Doing stretching exercises at least 3 times per week.                     | −0.033     | 0.245 | −0.007         | 0.803 | 0.008         | 0.774  | 0.034         | 0.229  | 0.062            | 0.026  | 0.000      | 0.978 |
| Getting exercise during usual daily activities.                           | 0.009      | 0.756 | 0.000          | 0.998 | 0.085         | 0.002  | 0.124         | <0.001 | 0.078            | 0.005  | −0.003     | 0.926 |
| Checking pulse rate when exercising.                                      | −0.026     | 0.353 | 0.023          | 0.419 | 0.065         | 0.020  | 0.030         | 0.285  | 0.037            | 0.192  | −0.009     | 0.741 |
| Reaching target heart rate when exercising.                               | −0.027     | 0.343 | −0.038         | 0.184 | −0.003        | 0.914  | 0.000         | 0.999  | 0.050            | 0.080  | −0.023     | 0.422 |
| <b>Nutrition</b>                                                          |            |       |                |       |               |        |               |        |                  |        |            |       |
| Choose a diet low in fat, saturated fat, and cholesterol.                 | −0.026     | 0.355 | 0.020          | 0.473 | 0.059         | 0.034  | 0.135         | <0.001 | 0.061            | 0.029  | −0.002     | 0.951 |
| Limiting the use of sugars and sweets.                                    | −0.022     | 0.429 | 0.015          | 0.595 | 0.052         | 0.062  | 0.070         | 0.012  | 0.064            | 0.023  | −0.034     | 0.228 |
| Eating daily servings of bread, cereal, rice and pasta                    | −0.020     | 0.489 | 0.005          | 0.868 | 0.033         | 0.241  | 0.021         | 0.455  | 0.027            | 0.341  | −0.021     | 0.471 |
| Eating daily servings of fruit.                                           | −0.005     | 0.857 | 0.010          | 0.729 | 0.068         | 0.016  | 0.108         | <0.001 | 0.059            | 0.036  | 0.037      | 0.193 |
| Eating daily servings of vegetables.                                      | −0.033     | 0.241 | −0.009         | 0.756 | 0.065         | 0.021  | 0.053         | 0.056  | 0.016            | 0.559  | −0.039     | 0.166 |
| Eating daily servings of milk, yogurt or cheese.                          | −0.035     | 0.216 | 0.004          | 0.898 | 0.042         | 0.141  | 0.060         | 0.033  | 0.044            | 0.118  | −0.056     | 0.047 |
| Eating daily servings of meat, poultry, fish, dried beans, eggs and nuts. | −0.015     | 0.586 | −0.057         | 0.045 | −0.005        | 0.861  | −0.010        | 0.735  | 0.038            | 0.175  | −0.014     | 0.634 |
| Reading labels to identify nutrients.                                     | −0.051     | 0.067 | 0.024          | 0.398 | 0.022         | .432   | 0.081         | 0.004  | 0.079            | 0.005  | −0.061     | 0.029 |
| Eating breakfast.                                                         | 0.021      | 0.458 | −0.033         | 0.242 | 0.036         | 0.197  | 0.080         | 0.004  | 0.048            | 0.084  | −0.037     | 0.192 |

\* Abbreviations: WC, Waist circumference; FBG, Fasting blood glucose; SBP, Systolic blood pressure; DBP, Diastolic blood pressure; TG, Triglyceride; HDL-C, High-density lipoprotein cholesterol; BMI, body mass index. <sup>†</sup> Correlations of metabolic risk factors and nutrition and exercise health behavior were examined by bivariate correlation test.

**Table S5.** Correlations of metabolic risk factors and exercise and nutrition health behavior for BMI  $\geq 27$  <sup>†</sup>.

| Variables *                                                               | WC<br>(cm) |       | FBG<br>(mg/dL) |       | SBP<br>(mmHg) |        | DBP<br>(mmHg) |        | HDL-C<br>(mg/dL) |       | TG (mg/dL) |       |
|---------------------------------------------------------------------------|------------|-------|----------------|-------|---------------|--------|---------------|--------|------------------|-------|------------|-------|
|                                                                           | r          | p     | r              | p     | r             | p      | r             | p      | r                | p     | r          | p     |
| <b>Physical Activity</b>                                                  |            |       |                |       |               |        |               |        |                  |       |            |       |
| Following a planned exercise program.                                     | −0.063     | 0.086 | −0.019         | 0.601 | 0.141         | <0.001 | 0.152         | <0.001 | 0.074            | 0.042 | −0.026     | 0.471 |
| Exercising vigorously for 20 or more minutes at least 3 times per week.   | −0.069     | 0.057 | −0.043         | 0.239 | 0.116         | 0.001  | .126          | <0.001 | 0.108            | 0.003 | −0.037     | 0.312 |
| Taking part in light to moderate physical activity.                       | −0.053     | 0.144 | −0.020         | 0.573 | 0.080         | 0.027  | 0.101         | 0.005  | 0.053            | 0.145 | −0.067     | 0.063 |
| Taking part in leisure-time (recreational) physical activities.           | −0.071     | 0.048 | −0.082         | 0.024 | 0.035         | 0.329  | 0.026         | 0.478  | 0.006            | 0.868 | −0.015     | 0.675 |
| Doing stretching exercises at least 3 times per week.                     | −0.061     | 0.091 | −0.008         | 0.830 | 0.098         | 0.007  | 0.101         | 0.005  | −0.016           | 0.660 | 0.022      | 0.551 |
| Getting exercise during usual daily activities.                           | −0.101     | 0.005 | −0.023         | 0.528 | 0.063         | 0.080  | .073          | 0.043  | 0.077*           | 0.034 | −0.058     | 0.110 |
| Checking pulse rate when exercising.                                      | 0.015      | 0.686 | 0.031          | 0.392 | 0.139         | <0.001 | 0.117         | 0.001  | 0.031            | 0.394 | 0.003      | 0.935 |
| Reaching target heart rate when exercising.                               | −0.008     | 0.824 | 0.019          | 0.616 | 0.063         | 0.090  | .094          | 0.012  | 0.036            | 0.329 | −0.002     | 0.955 |
| <b>Nutrition</b>                                                          |            |       |                |       |               |        |               |        |                  |       |            |       |
| Choose a diet low in fat, saturated fat, and cholesterol.                 | 0.000      | 0.993 | 0.008          | 0.822 | 0.049         | 0.179  | 0.147         | <0.001 | 0.023            | 0.526 | 0.000      | 0.990 |
| Limiting the use of sugars and sweets.                                    | 0.005      | 0.880 | 0.038          | 0.295 | 0.052         | 0.149  | 0.070         | 0.053  | 0.003            | 0.936 | 0.001      | 0.982 |
| Eating daily servings of bread, cereal, rice and pasta                    | 0.018      | 0.634 | −0.012         | 0.739 | 0.014         | 0.713  | 0.023         | 0.534  | 0.049            | 0.188 | −0.025     | 0.500 |
| Eating daily servings of fruit.                                           | −0.024     | 0.513 | 0.031          | 0.397 | 0.065         | 0.077  | 0.152         | <0.001 | 0.063            | 0.085 | 0.001      | 0.971 |
| Eating daily servings of vegetables.                                      | −0.005     | 0.881 | 0.023          | 0.534 | 0.033         | 0.359  | 0.057         | .114   | 0.014            | 0.707 | 0.000      | 0.986 |
| Eating daily servings of milk, yogurt or cheese.                          | 0.000      | 0.997 | −0.063         | 0.083 | −0.009        | .815   | −0.028        | .451   | −0.011           | 0.767 | 0.079      | 0.031 |
| Eating daily servings of meat, poultry, fish, dried beans, eggs and nuts. | 0.001      | 0.986 | 0.030          | 0.416 | −0.037        | 0.317  | −0.057        | 0.125  | −0.086           | 0.019 | −0.010     | 0.786 |
| Reading labels to identify nutrients.                                     | 0.001      | 0.983 | 0.036          | 0.321 | 0.022         | 0.547  | 0.085         | 0.020  | 0.074            | 0.040 | −0.051     | 0.157 |
| Eating breakfast.                                                         | −0.027     | 0.454 | −0.040         | 0.267 | −0.014        | 0.708  | 0.034         | 0.348  | 0.079            | 0.030 | −0.065     | 0.074 |

\* Abbreviations: WC, Waist circumference; FBG, Fasting blood glucose; SBP, Systolic blood pressure; DBP, Diastolic blood pressure; TG, Triglyceride; HDL-C, High-density lipoprotein cholesterol; BMI, body mass index. <sup>†</sup> Correlations of metabolic risk factors and nutrition and exercise health behavior were examined by bivariate correlation test.
